# Supplementary material for: High-quality UV optoelectrical and high-mobility T-ODL/Ti:ZnO epilayers on an amorphous substrate through tailoring the interfacial nucleation process by atomic layer deposition
Source: Royal Society of Chemistry journal article supplement (doi:10.1039/c8tc02722f), 2018-01-01
Supplement: c8tc02722f1.pdf [file c8tc02722f1.pdf]

## Supporting Information

High quality UV optoelectrical and high mobility T-ODL/Ti:ZnO epilayers on amorphous substrate through tailoring interfacial nucleation process by atomic layer deposition

*Jin Li and Xiaofang Bi\**

Key Laboratory of Aerospace Materials and Performance (Ministry of Education), School of Materials Science and Engineering, Beihang University (BUAA), Beijing, 100191, China

**\*Corresponding Author**

E-mail: bixf@buaa.edu.cn; Phone: +86-10-82339231

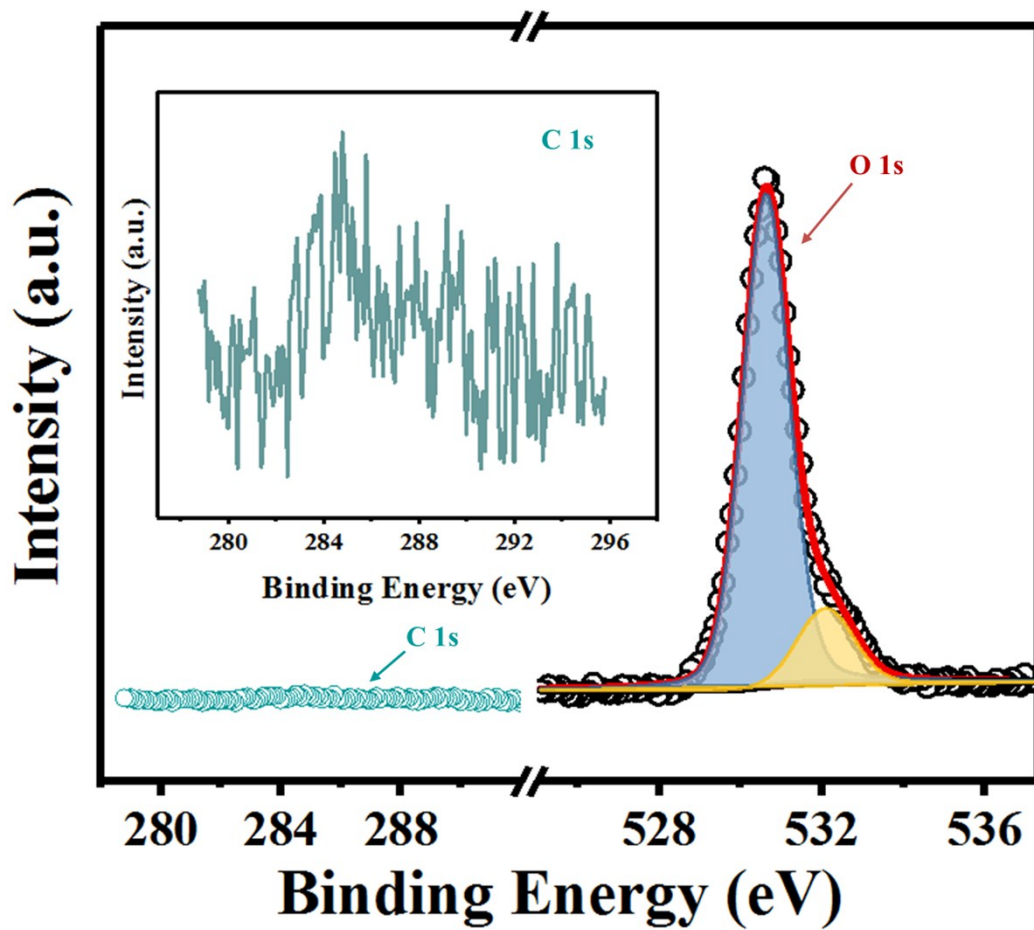

**Figure S1.** High resolution XPS profiles for C 1s and O 1s core levels of the Ti:ZnO film. Inset is the enlarged view for the C 1s line.

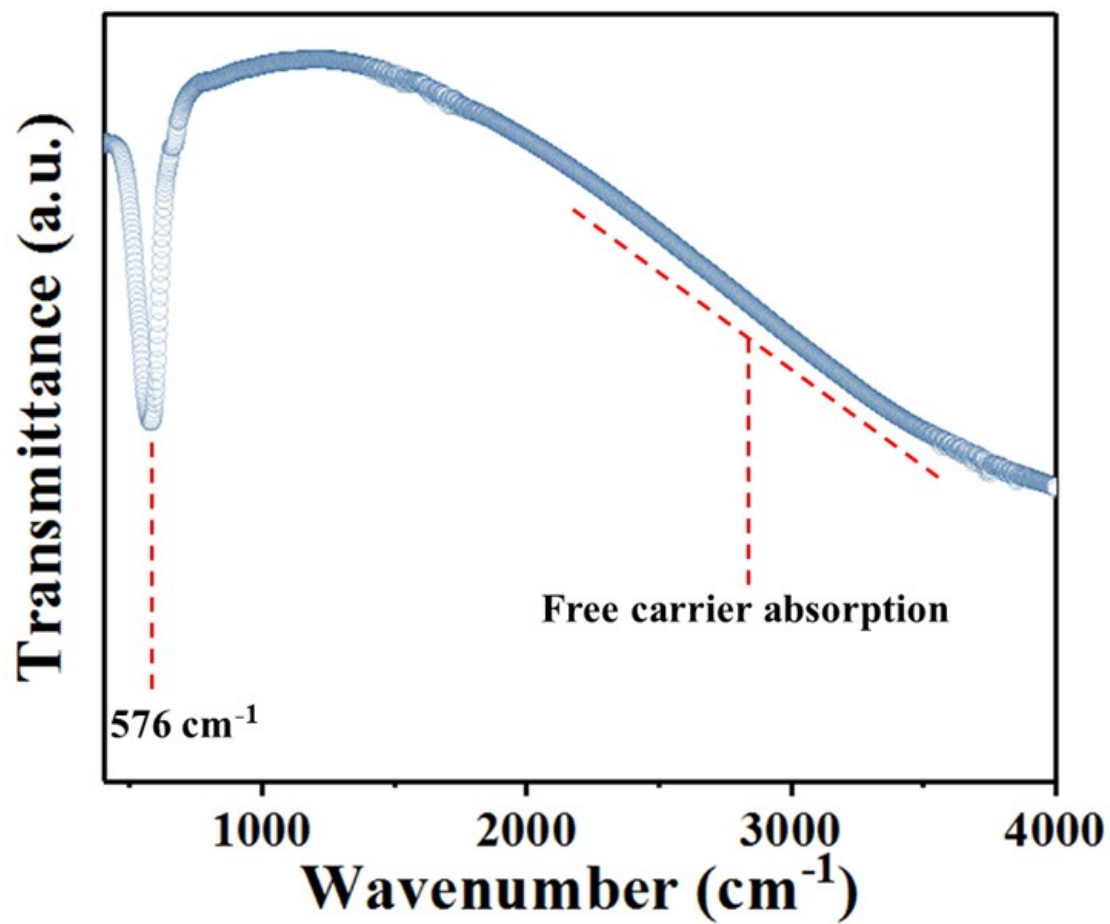

**Figure S2.** Fourier transform infrared (FTIR) transmittance spectrum of ALD ZnO film.
